# Supplementary material
Source: publisher figshare collection journal article supplement (https://acs.figshare.com/ndownloader/files/4343083)
Supplement: Supplementary file 1 [file 4343083]

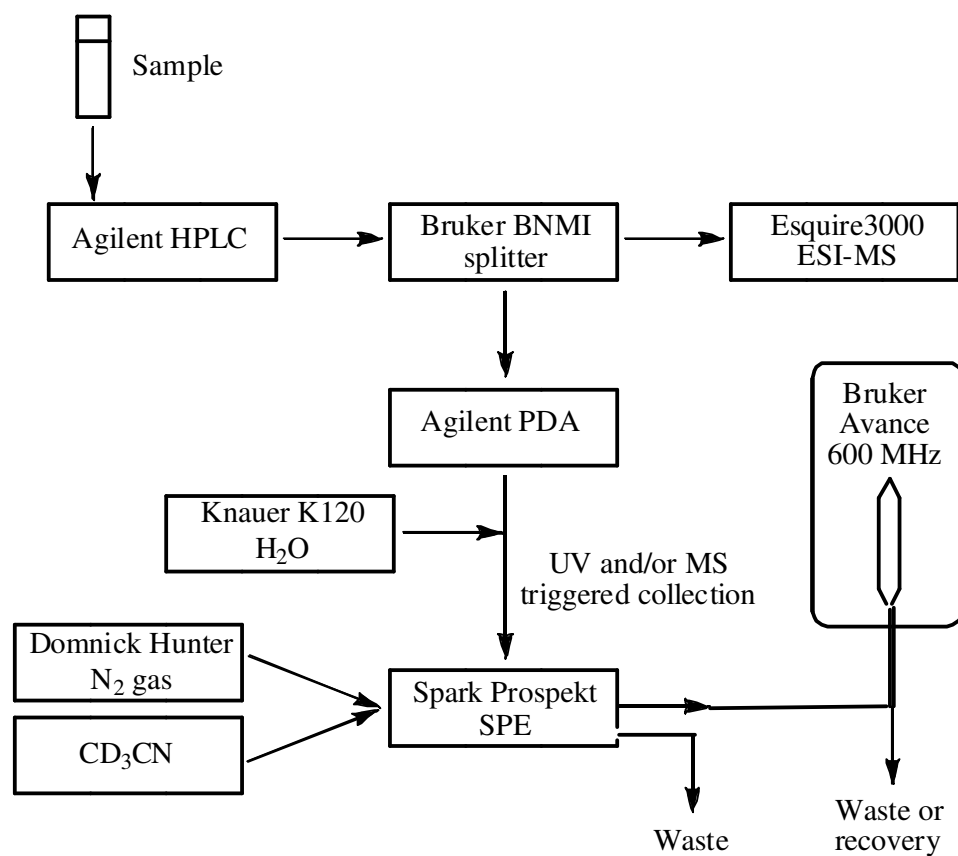

**Figure 1.** Principle of operation of the HPLC-UV/MS-SPE-NMR instrument: 1) separation of the sample was performed by reversed-phase HPLC, 2) chromatographic peaks were detected using a photodiode array detector in-line with an ion trap mass spectrometer and the peaks of interest trapped on solid-phase extraction (SPE) cartridges after dilution of the HPLC eluate with water, 3) the loaded SPE cartridges were nitrogen dried and the analytes transferred to a 600 MHz NMR spectrometer using  $\text{CD}_3\text{CN}$ .

## Abbreviation List

|       |                                          |
|-------|------------------------------------------|
| MeOH  | methanol                                 |
| XAD-2 | chromatography resin                     |
| LH-20 | chromatography resin                     |
| LC    | liquid chromatography                    |
| RP    | reverse-phase                            |
| RT    | retention time                           |
| UV    | ultra violet                             |
| MW    | molecular weight                         |
| MS    | mass spectrometry                        |
| APCI  | Atmospheric pressure chemical ionization |
| ESI   | electrospray ionisation                  |
| MS/MS | tandem mass spectrometry                 |
| $m/z$ | mass-to-charge ratio                     |
| NMR   | nuclear magnetic resonance               |
| SPE   | solid phase extraction                   |

|                     |                                                                    |
|---------------------|--------------------------------------------------------------------|
| CD <sub>3</sub> CN  | deuterated acetonitrile                                            |
| Hz                  | Hertz                                                              |
| MHz                 | mega hertz                                                         |
| ppm                 | parts per million                                                  |
| $\delta_{\text{H}}$ | proton chemical shift                                              |
| $\delta_{\text{C}}$ | carbon chemical shift                                              |
| $J$                 | coupling constant                                                  |
| m                   | multiplicity                                                       |
| COSY                | <sup>1</sup> H- <sup>1</sup> H Correlation SpectroscopY experiment |
| HSQC                | Heteronuclear Single Quantum Correlation experiment                |
| HMBC                | Heteronuclear Multiple Bond Correlation experiment                 |
| TOCSY               | TOtal Correlation SpectroscopY experiment                          |
| NOESY               | multiple presaturation 1D Nuclear Overhauser Effect SpectroscopY   |
